# Supplementary material for: A promising strategy to improve the stability and immunogenicity of killed but metabolically active vaccines: low-temperature preparation and coating of nanoparticles
Source: Royal Society of Chemistry journal article supplement (doi:10.1039/d4nr02323d), 2024-01-01
Supplement: d4nr02323d1.pdf [file d4nr02323d1.pdf]

## Supplementary Information

### **A Promising Strategy to Improve Stability and Immunogenicity of Killed but Metabolically Active Vaccines: Low Temperature Preparation and Coating of Nanoparticles**

*Ning Zhao,<sup>a</sup> Jia-Xv Li,<sup>ab</sup> Yong-Jiao Han,<sup>ab</sup> Li-Ping Lv,<sup>a</sup> Jiang Deng<sup>\*a</sup> and Yan-Yu Zhang<sup>\*a</sup>*

- a. Academy of Military Medical Sciences, Beijing 100850, China.
- b. College of Biotechnology, Tianjin University of Science & Technology, Tianjin 300457, China.

---

\*Corresponding author.

Mail to: No.27 Taiping Road, Beijing, 100850, China.

Email: ammsdjaxm@163.com (Jiang Deng)

Email: swgczhyy@126.com (Yan-Yu Zhang)

Tel: +86-010-66931997

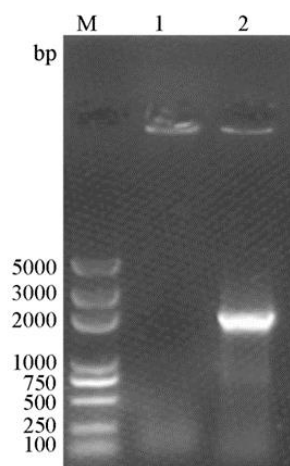

**Fig. S1.** Identification of  $\Delta$ uvrA bacteria and original bacteria, 1:  $\Delta$ uvrA bacteria; 2: original bacteria.

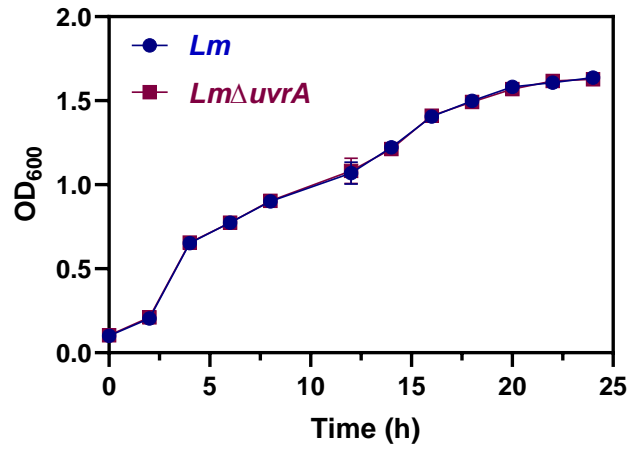

Fig. S2. Growth curve of *LmΔuvrA* and *Lm*.

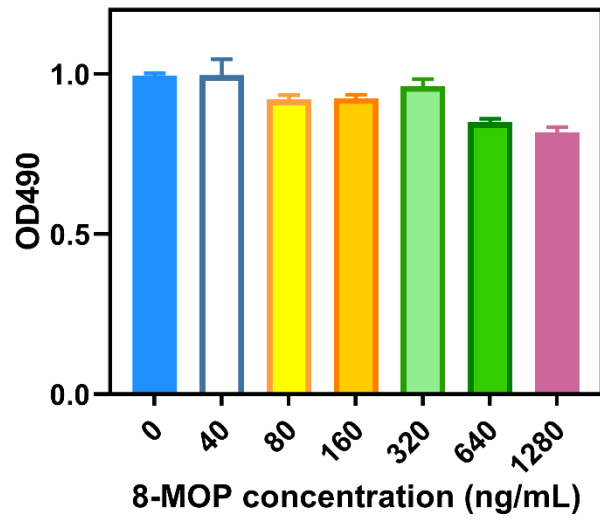

**Fig. S3.** The effect of 8-MOP on bacterial metabolic activity. Co-incubation of different concentrations of 8-MOP with bacteria for 40 min.

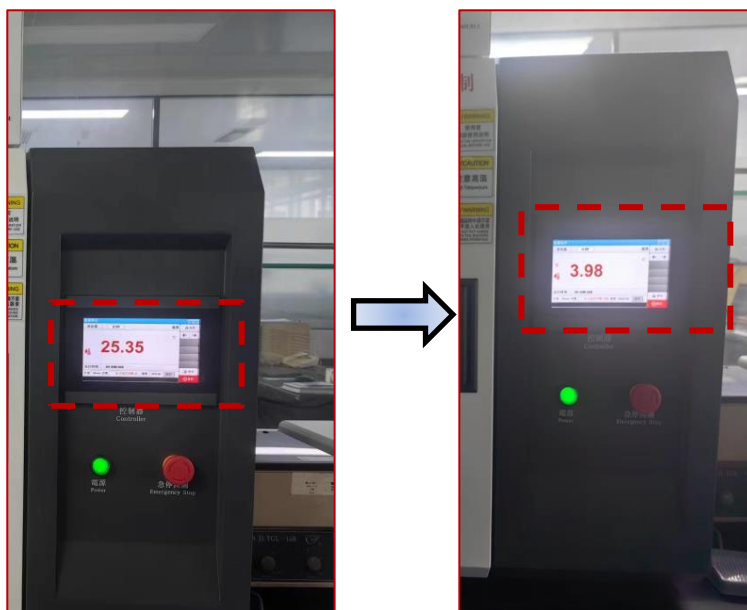

**Fig. S4.** Temperature display on the UVA-LEDs setup.

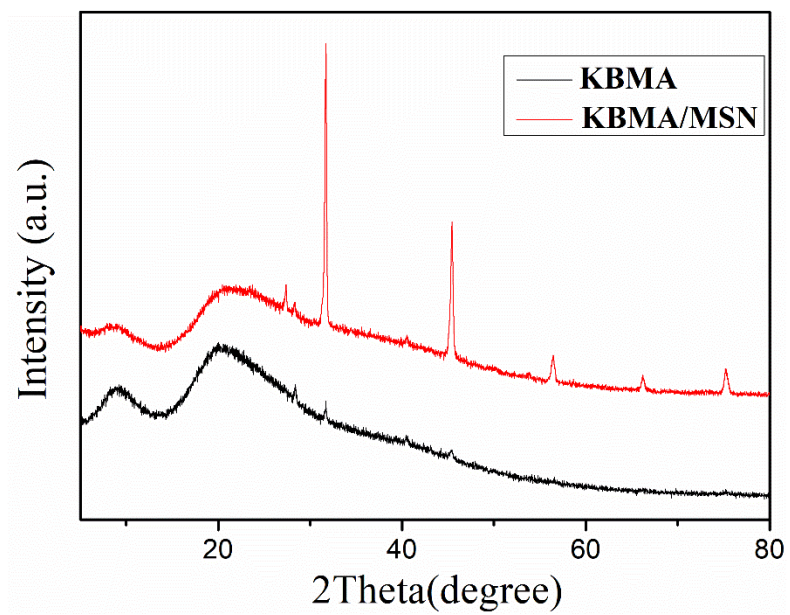

**Fig. S5.** XRD patterns of KBMA and KBMA/MSN.

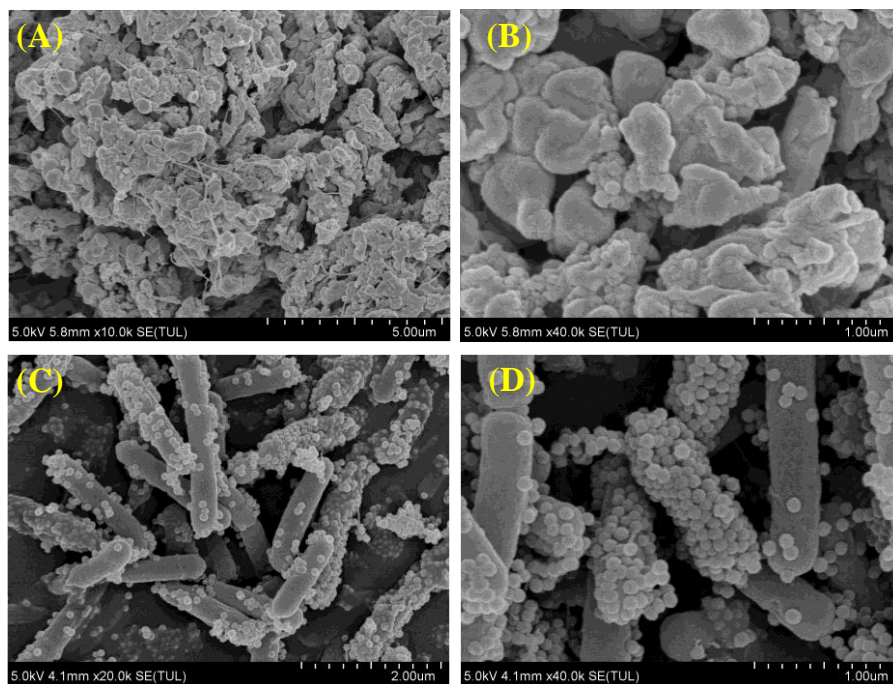

**Fig. S6.** (A -B) SEM images of KBMA/MSN bacteria after treatment with SPF for 48 h; (C-D) SEM images of KBMA/MSN bacteria.

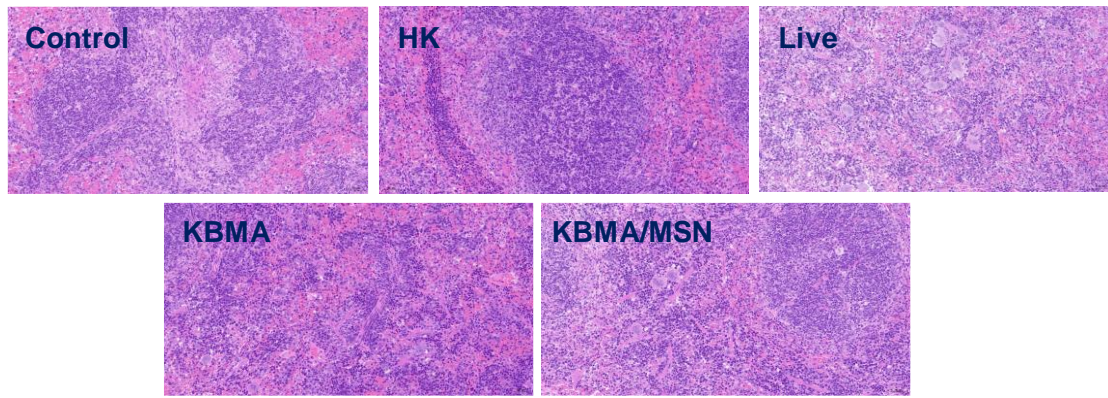

**Fig. S7.** Histological sections of the mice spleen (H&E magnifications, 200 $\times$ ) (n=3).
